# Supplementary material
Source: Research Square preprint supplement (doi:10.21203/rs.3.rs-9337626/v1)
Supplement: Supplementary file 1 [file 8c4556fb60e9e36de373925b.docx]

**Supplementary Table 1. Appendix A: Diagnosis and Procedure Codes**

| **Diagnosis** | **ICD-9-CM, ICD-10-CM** |
| --- | --- |
| Lumbar Degeneration | ICD-9-D-7213, ICD-9-D-72252, ICD-9-D-72210, ICD-9-D-72402, ICD-9-D-72403, ICD-9-D-7242,ICD-10-D-M4806, ICD-10-D-M4807, ICD-10-D-M4808, ICD-10-D-M4809,ICD-10-D-M5116, ICD-10-D-M5117, ICD-10-D-M5118, ICD-10-D-M5119,ICD-10-D-M4726, ICD-10-D-M4727, ICD-10-D-M4728, ICD-10-D-M4729,ICD-10-D-M5416, ICD-10-D-M5417, ICD-10-D-M5418, ICD-10-D-M5419 |
| **Procedure** | **CPT** |
| Hip Fracture Fixation | CPT-27235, CPT-27236, CPT-27244, CPT-27245 |
| Lumbar Fusion | CPT-22558, CPT-22585, CPT-22586, CPT-22612, CPT-22630, CPT-22632, CPT-22633, CPT-22634 |
| Fusion Levels 1-6 | CPT-22842, CPT-22558, CPT-22612 |
| Fusion Levels 7-13+ | CPT-22843, CPT-22844 |

**Supplementary Table 2. Appendix B: Baseline Characteristics**

| **Diagnosis** | **ICD-9-CM, ICD-10-CM** |
| --- | --- |
| Osteoporosis/Osteopenia | ICD-10-D-M810, ICD-10-D-M816, ICD-10-D-M818, ICD-10-D-M8580 |
| Diabetes | ICD-9-D-24900, ICD-9-D-25099, ICD-9-D-7902, ICD-9-D-79021, ICD-9-D-79022, ICD-9-D-79029, ICD-9-D-7915, ICD-9-D-7916, ICD-10-D-E080, ICD-10-D-E139 |
| Obesity | ICD-9-D-2780, ICD-9-D-27800, ICD-9-D-27801, ICD-9-D-27802, ICD-9-D-27803, ICD-10-D-E660, ICD-10-D-E669 |
| Tobacco | ICD-9-D-3051, ICD-9-D-98984, ICD-9-D-V1582, ICD-10-D-F17220, ICD-10-D-F17221, ICD-10-D-F17223, ICD-10-D-F17228, ICD-10-D-F17229, ICD-10-D-F17290, ICD-10-D-F17291, ICD-10-D-F17293, ICD-10-D-F17298, ICD-10-D-F17299, ICD-10-D-Z720 |
| Renal Failure | ICD-9-D-40301, ICD-9-D-40311, ICD-9-D-40391, ICD-9-D-40402, ICD-9-D-40403, ICD-9-D-40412, ICD-9-D-40413, ICD-9-D-40492, ICD-9-D-40493, ICD-9-D-5850,ICD-9-D-5869, ICD-9-D-5880, ICD-9-D-V420, ICD-9-D-V451, ICD-9-D-V560,ICD-9-D-V569, ICD-10-D-I120, ICD-10-D-I1311, ICD-10-D-N180,ICD-10-D- NI9, ICD-10-D-N250, ICD-10-D-Z4901,ICD-10-D-Z4902, ICD-10-D-Z940, ICD-10-D-Z992 |
